# Supplementary material
Source: Springer Nature journal article supplement (https://www.springermedizin.de/resource/supplementary/12947_2007_176_MOESM2_ESM.pdf/9556392)
Supplement: MOESM2 [file 9556392]

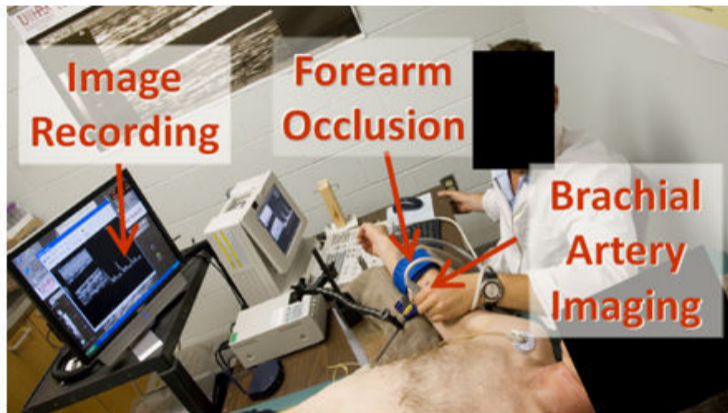

**Experimental Set Up for FMD**

**Pre-EXERCISE FMD**

↓ 5 min

**EXERCISE BOUT**

(treadmill, cycle-ergometer,  
handgrip, knee extension, etc)

↓ 0 to 23 h

**Post-EXERCISE FMD**
